# Supplementary material for: Self-selective passivation of diversely charged SnO2/CsPbI3 heterointerfaces using binary ionic compounds
Source: Royal Society of Chemistry journal article supplement (doi:10.1039/d3ta02378h), 2023-01-01
Supplement: d3ta02378h1.pdf [file d3ta02378h1.pdf]

1 **Supplementary Information:**

2 **Self-selective passivation of the diversely charged SnO<sub>2</sub>/CsPbI<sub>3</sub> heterointerfaces by binary**  
3 **ionic compound**

4 Huiwen Xiang,<sup>1</sup> Jinping Zhang,<sup>2</sup> Ke Zhao,<sup>3</sup> Haiyue Zhang,<sup>1</sup> Feifei Ren,<sup>1</sup> Yu Jia,<sup>1</sup>  
5 Chengyan Liu,<sup>1,2\*</sup>

6 <sup>1</sup>Henan Key Laboratory of Photovoltaic Materials, Key Laboratory for Special Functional  
7 Materials of Ministry of Education, and School of Materials Science and Engineering, Henan  
8 University, Kaifeng 475004, China.

9 <sup>2</sup>Faculty of Engineering, Huanghe Science and Technology College, Zhengzhou 450006, China

10 <sup>3</sup>International Laboratory for Quantum Functional Materials of Henan, and School of Physics and  
11 Microelectronics, Zhengzhou University, Zhengzhou 450001, China

12 \*Electronic mail: cyliu@henu.edu.cn

13 **I. Atomic structures and surface energy calculations**

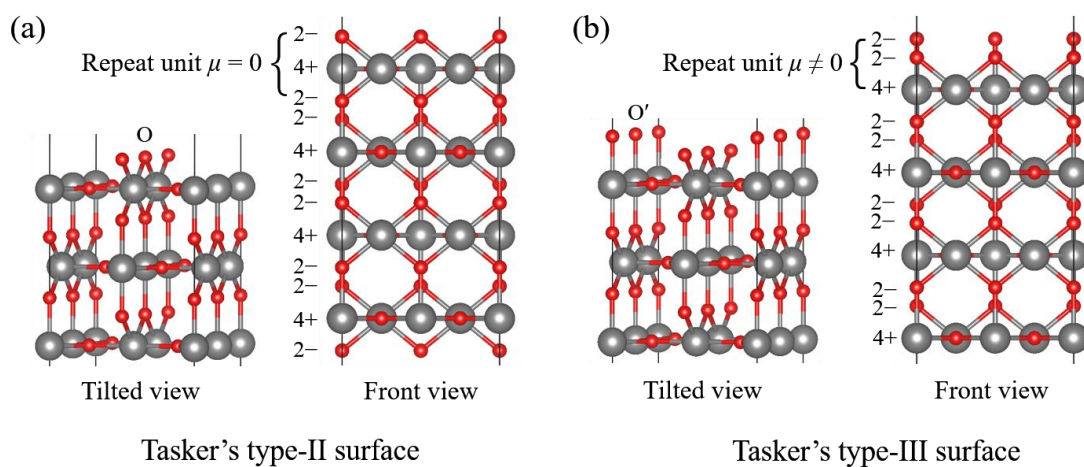

14  
15 **Fig. S1.** The O-terminated and O'-terminated SnO<sub>2</sub> surfaces. (a) The O-terminated SnO<sub>2</sub> surface that is stable  
16 Tasker's type-II surface with charged planes but no net dipole moment ( $\mu$ ) perpendicular to surface. (b) The O'-  
17 terminated SnO<sub>2</sub> surface that is unstable Tasker's type-III surface with dipole moment normal to surface.

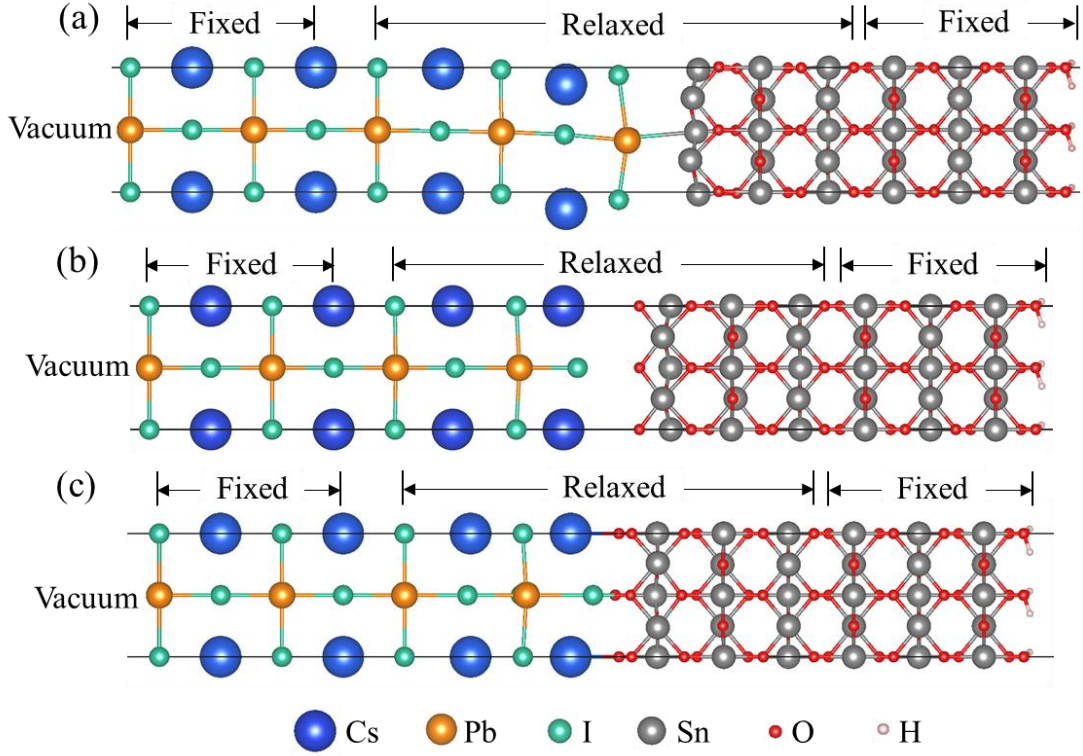

18

19 **Fig. S2.** The relaxed atomic structures of SnO<sub>2</sub> (110)/CsPbI<sub>3</sub> (100) heterojunctions with relatively higher binding  
 20 energies than that of structures shown by Fig. 1 in the main text. (a) The slab of SnO<sub>2</sub>-SnO/CsPbI<sub>3</sub>-PbI heterojunction  
 21 with SnO-terminal of SnO<sub>2</sub> (110) and PbI-terminal of CsPbI<sub>3</sub> (100) interfaces. (b) The slab of SnO<sub>2</sub>-O/CsPbI<sub>3</sub>-CsI  
 22 heterojunction with O-terminal of SnO<sub>2</sub> (110) and CsI-terminal of CsPbI<sub>3</sub> (100) interfaces. (c) The slab of SnO<sub>2</sub>-  
 23 O'/CsPbI<sub>3</sub>-CsI heterojunction with O'-terminal of SnO<sub>2</sub> (110) and CsI-terminal of CsPbI<sub>3</sub> (100) interfaces. The lattice  
 24 constants of the slab are  $a = 6.43 \text{ \AA}$ ,  $b = 6.58 \text{ \AA}$  and  $c = 72.00 \text{ \AA}$  with a  $20 \text{ \AA}$  vacuum layer. The atoms colored blue,  
 25 gold, green, grey, red and pink represent Cs, Pb, I, Sn, O and pseudo-H, respectively. The relaxed and fixed atomic  
 26 layers represent the interface and the bulk, respectively.

27 The surface energies of SnO<sub>2</sub> (110) and CsPbI<sub>3</sub> (100) are calculated based on the models shown  
 28 in Fig. S3. The calculation formulas are

$$29 \quad E_A(\text{surface}) = \frac{1}{2} [E_{A\text{-slab}} - 8E_A - 4(\mu_O + \mu_O^0)] \quad (\text{S1})$$

30 and

$$31 \quad E_B(\text{surface}) = \frac{1}{2} [E_{B\text{-slab}} - 4E_B - (\mu_{\text{Pb}} + \mu_{\text{Pb}}^0) - 2(\mu_I + \mu_I^0)] \quad (\text{S2})$$

32 where  $E_A(\text{surface})$  and  $E_B(\text{surface})$  are surface energies of SnO<sub>2</sub> and CsPbI<sub>3</sub>, respectively.  $E_{A(B)\text{-slab}}$   
 33 and  $E_{A(B)}$  are the total energies of the SnO<sub>2</sub> (CsPbI<sub>3</sub>) slab [Fig. S3b(d)] and SnO<sub>2</sub> (CsPbI<sub>3</sub>) primitive  
 34 cell [Fig. 3a(c)], respectively.  $\mu_O$ ,  $\mu_{\text{Pb}}$  and  $\mu_I$  are the chemical potentials of O, Pb and I atoms  
 35 relative to those of their pure elemental phases  $\mu_O^0$ ,  $\mu_{\text{Pb}}^0$  and  $\mu_I^0$ , respectively. Under equilibrium  
 36 growth condition, the elemental chemical potentials of SnO<sub>2</sub> are restricted by  $\mu_{\text{Sn}} + 2\mu_O = \Delta H_{\text{SnO}_2}$ ,

37  $\mu_{\text{Sn}} \leq 0$  and  $\mu_{\text{O}} \leq 0$ , while the elemental chemical potentials of CsPbI<sub>3</sub> are referenced to the  
 38 calculations in Ref. S1.

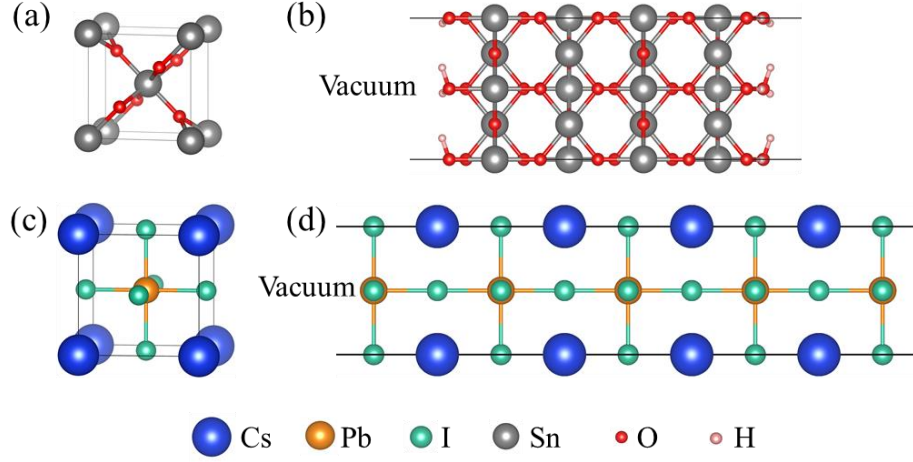

39  
 40 **Fig. S3.** The primitive cell and slab model of tetragonal SnO<sub>2</sub> and cubic CsPbI<sub>3</sub>. (a) Primitive cell of tetragonal SnO<sub>2</sub>  
 41 with a space group of P4<sub>2</sub>/mm. (b) SnO<sub>2</sub> (1 1 0) slab with O-terminal surfaces whose dangling bonds are passivated  
 42 by pseudo-hydrogen of H.66 pseudopotential. The slab consists of 16 Sn atoms, 36 O atoms, 12 pseudo-H atoms  
 43 and a 30 Å vacuum layer. (c) Primitive cell of cubic CsPbI<sub>3</sub> with a space group of Pm $\bar{3}$ m. (d) CsPbI<sub>3</sub> (1 0 0) slab  
 44 with PbI-terminal surfaces. The slab consists of 4 Cs atoms, 5 Pb atoms, 14 I atoms and a 20 Å vacuum layer. The  
 45 atoms colored blue, gold, cyan, grey, red and pink represent Cs, Pb, I, Sn, O and pseudo-H, respectively.

## 46 II. Elemental chemical potentials for SnO<sub>2</sub> phase

47 To obtain the SnO<sub>2</sub> host in thermodynamic equilibrium conditions, the chemical potentials of  
 48 Sn and O should satisfy

$$49 \quad \mu_{\text{Sn}} + 2\mu_{\text{O}} = \Delta H_{\text{SnO}_2} \quad (-4.96 \text{ eV}) \quad (\text{S3})$$

50 where  $\mu_{\text{Sn}}$  and  $\mu_{\text{O}}$  are the chemical potentials of Sn and O, respectively, referenced to their most  
 51 stable pure phases, and  $\Delta H_{\text{SnO}_2}$  is the formation enthalpy of SnO<sub>2</sub>. In addition, the precipitation of  
 52 the elemental host should be avoided by

$$53 \quad \mu_{\text{Sn}} \leq 0, \quad \mu_{\text{O}} \leq 0 \quad (\text{S4})$$

54 Considering the Mg, Zn, N and Cl dopants incorporation with the maximum allowed chemical  
 55 potentials, the associated secondary phases between these dopants and the host elements need to be  
 56 excluded by the conditions as determined by inequalities (S5), (S6), (S7) and (S8) for Mg, Zn, N  
 57 and Cl dopants, respectively. Based on this, the maximum allowed chemical potentials of dopants  
 58 in SnO<sub>2</sub> phase diagram are restricted by the secondary phases of Mg<sub>2</sub>SnO<sub>4</sub> and ZnO under Mg and  
 59 Zn cations doping, and by SnCl<sub>2</sub>, SnCl<sub>4</sub> and Sn(NO<sub>3</sub>)<sub>4</sub> under Cl and N anions doping (Fig. 3a and  
 60 3b of the main text).

$$\begin{aligned}
61 \quad & \left\{ \begin{array}{l} 9\mu_{\text{Mg}} + 5\mu_{\text{Sn}} \leq \Delta H_{\text{Mg}_9\text{Sn}_5} (\text{R3}) (-2.57 \text{ eV}) \\ 2\mu_{\text{Mg}} + \mu_{\text{Sn}} \leq \Delta H_{\text{Mg}_2\text{Sn}} (\text{Fm}\bar{3}\text{m}) (-0.57 \text{ eV}) \\ 3\mu_{\text{Mg}} + \mu_{\text{Sn}} \leq \Delta H_{\text{Mg}_3\text{Sn}} (\text{Pm}\bar{3}\text{m}) (-0.56 \text{ eV}) \\ \mu_{\text{Mg}} + \mu_{\text{Sn}} \leq \Delta H_{\text{MgSn}} (\text{P4/mmm}) (-0.25 \text{ eV}) \\ \mu_{\text{Mg}} + 3\mu_{\text{Sn}} \leq \Delta H_{\text{MgSn}_3} (\text{P6}_3/\text{mmc}) (-0.08 \text{ eV}) \\ \mu_{\text{Mg}} + 2\mu_{\text{Sn}} \leq \Delta H_{\text{MgSn}_2} (\text{C2/c}) (-0.15 \text{ eV}) \\ \mu_{\text{Mg}} + 5\mu_{\text{Sn}} \leq \Delta H_{\text{MgSn}_5} (\text{P6}_2\text{m}) (-0.12 \text{ eV}) \\ 5\mu_{\text{Mg}} + \mu_{\text{Sn}} \leq \Delta H_{\text{Mg}_5\text{Sn}} (\text{R32}) (-0.32 \text{ eV}) \\ \mu_{\text{Mg}} + \mu_{\text{O}} \leq \Delta H_{\text{MgO}} (\text{Fm}\bar{3}\text{m}) (-5.49 \text{ eV}) \\ \mu_{\text{Mg}} + 2\mu_{\text{O}} \leq \Delta H_{\text{MgO}_2} (\text{Pa}\bar{3}) (-5.19 \text{ eV}) \\ 2\mu_{\text{Mg}} + \mu_{\text{Sn}} + 4\mu_{\text{O}} \leq \Delta H_{\text{Mg}_2\text{SnO}_4} (\text{Imma}) (-16.11 \text{ eV}) \\ \mu_{\text{Mg}} + \mu_{\text{Sn}} + 3\mu_{\text{O}} \leq \Delta H_{\text{MgSnO}_3} (\text{R}\bar{3}) (-10.52 \text{ eV}) \end{array} \right. \\
& \left\{ \begin{array}{l} \mu_{\text{Mg}} + 2\mu_{\text{Sn}} + 5\mu_{\text{O}} \leq \Delta H_{\text{MgSn}_2\text{O}_5} (\text{Cmcm}) (-15.27 \text{ eV}) \\ 2\mu_{\text{Mg}} + 3\mu_{\text{Sn}} + 8\mu_{\text{O}} \leq \Delta H_{\text{Mg}_2\text{Sn}_3\text{O}_8} (\text{P6}_3/\text{mc}) (-25.48 \text{ eV}) \\ 3\mu_{\text{Mg}} + 2\mu_{\text{Sn}} + 7\mu_{\text{O}} \leq \Delta H_{\text{Mg}_3\text{Sn}_2\text{O}_7} (\text{Cmc2}_1) (-25.84 \text{ eV}) \\ 2\mu_{\text{Mg}} + 9\mu_{\text{Sn}} + 13\mu_{\text{O}} \leq \Delta H_{\text{Mg}_2\text{Sn}_9\text{O}_{13}} (\text{C2/m}) (-37.48 \text{ eV}) \\ \mu_{\text{Mg}} + 2\mu_{\text{Sn}} + 4\mu_{\text{O}} \leq \Delta H_{\text{Mg}(\text{SnO}_2)_2} (\text{Imma}) (-12.38 \text{ eV}) \\ \mu_{\text{Mg}} + 4\mu_{\text{Sn}} + 8\mu_{\text{O}} \leq \Delta H_{\text{Mg}(\text{SnO}_2)_4} (\text{Cm}) (-21.27 \text{ eV}) \\ \mu_{\text{Mg}} + \mu_{\text{Sn}} + 2\mu_{\text{O}} \leq \Delta H_{\text{MgSnO}_2} (\text{P1}) (-7.38 \text{ eV}) \\ \mu_{\text{Mg}} + 4\mu_{\text{Sn}} + 9\mu_{\text{O}} \leq \Delta H_{\text{MgSn}_4\text{O}_9} (\text{P4/n}) (-22.82 \text{ eV}) \\ \mu_{\text{Mg}} + 3\mu_{\text{Sn}} + 7\mu_{\text{O}} \leq \Delta H_{\text{MgSn}_3\text{O}_7} (\text{Pnma}) (-18.22 \text{ eV}) \\ 2\mu_{\text{Mg}} + 2\mu_{\text{Sn}} + 5\mu_{\text{O}} \leq \Delta H_{\text{Mg}_2\text{Sn}_2\text{O}_5} (\text{Pbam}) (-14.93 \text{ eV}) \\ \mu_{\text{Mg}} + \mu_{\text{Sn}} + 6\mu_{\text{O}} \leq \Delta H_{\text{MgSnO}_6} (\text{Fm}\bar{3}\text{m}) (-0.99 \text{ eV}) \end{array} \right. \quad (\text{S5})
\end{aligned}$$

$$\begin{aligned}
62 \quad & \left\{ \begin{array}{l} 3\mu_{\text{Zn}} + \mu_{\text{Sn}} \leq \Delta H_{\text{Zn}_3\text{Sn}} (\text{P}\bar{1}) (0.33 \text{ eV}) \\ \mu_{\text{Zn}} + 3\mu_{\text{Sn}} \leq \Delta H_{\text{ZnSn}_3} (\text{P6}_3/\text{mmc}) (0.48 \text{ eV}) \\ \mu_{\text{Zn}} + \mu_{\text{O}} \leq \Delta H_{\text{ZnO}} (\text{P6}_3/\text{mc}) (-2.90 \text{ eV}) \\ \mu_{\text{Zn}} + 2\mu_{\text{O}} \leq \Delta H_{\text{ZnO}_2} (\text{Pa}\bar{3}) (-2.23 \text{ eV}) \\ 2\mu_{\text{Zn}} + \mu_{\text{Sn}} + 4\mu_{\text{O}} \leq \Delta H_{\text{Zn}_2\text{SnO}_4} (\text{Imma}) (-10.64 \text{ eV}) \\ \mu_{\text{Zn}} + \mu_{\text{Sn}} + 3\mu_{\text{O}} \leq \Delta H_{\text{ZnSnO}_3} (\text{R3c}) (-7.66 \text{ eV}) \\ \mu_{\text{Zn}} + 2\mu_{\text{Sn}} + 5\mu_{\text{O}} \leq \Delta H_{\text{ZnSn}_2\text{O}_5} (\text{Cmcm}) (-12.33 \text{ eV}) \\ 3\mu_{\text{Zn}} + 2\mu_{\text{Sn}} + 7\mu_{\text{O}} \leq \Delta H_{\text{Zn}_3\text{Sn}_2\text{O}_7} (\text{Cmc2}_1) (-17.86 \text{ eV}) \\ 2\mu_{\text{Zn}} + 3\mu_{\text{Sn}} + 8\mu_{\text{O}} \leq \Delta H_{\text{Zn}_2\text{Sn}_3\text{O}_8} (\text{P6}_3/\text{mc}) (-19.64 \text{ eV}) \end{array} \right. \\
& \left\{ \begin{array}{l} \mu_{\text{Zn}} + \mu_{\text{Sn}} + 2\mu_{\text{O}} \leq \Delta H_{\text{ZnSnO}_2} (\text{P1}) (-5.13 \text{ eV}) \\ \mu_{\text{Zn}} + 2\mu_{\text{Sn}} + 4\mu_{\text{O}} \leq \Delta H_{\text{Zn}(\text{SnO}_2)_2} (\text{Imma}) (-9.61 \text{ eV}) \\ \mu_{\text{Zn}} + 4\mu_{\text{Sn}} + 8\mu_{\text{O}} \leq \Delta H_{\text{Zn}(\text{SnO}_2)_4} (\text{Cm}) (-18.81 \text{ eV}) \\ 2\mu_{\text{Zn}} + 9\mu_{\text{Sn}} + 13\mu_{\text{O}} \leq \Delta H_{\text{Zn}_2\text{Sn}_9\text{O}_{13}} (\text{P1}) (-31.37 \text{ eV}) \\ \mu_{\text{Zn}} + 3\mu_{\text{Sn}} + 7\mu_{\text{O}} \leq \Delta H_{\text{ZnSn}_3\text{O}_7} (\text{Pnma}) (-15.19 \text{ eV}) \\ \mu_{\text{Zn}} + 4\mu_{\text{Sn}} + 9\mu_{\text{O}} \leq \Delta H_{\text{ZnSn}_4\text{O}_9} (\text{P4/n}) (-19.75 \text{ eV}) \\ \mu_{\text{Zn}} + 5\mu_{\text{Sn}} + 7\mu_{\text{O}} \leq \Delta H_{\text{ZnSn}_5\text{O}_7} (\text{Cmcm}) (-14.73 \text{ eV}) \\ 2\mu_{\text{Zn}} + 2\mu_{\text{Sn}} + 5\mu_{\text{O}} \leq \Delta H_{\text{Zn}_2\text{Sn}_2\text{O}_5} (\text{Pmc2}_1) (-11.50 \text{ eV}) \\ \mu_{\text{Zn}} + 4\mu_{\text{Sn}} + 6\mu_{\text{O}} \leq \Delta H_{\text{Zn}(\text{Sn}_2\text{O}_3)_2} (\text{Cmcm}) (-11.89 \text{ eV}) \end{array} \right. \quad (\text{S6})
\end{aligned}$$

$$\begin{aligned}
63 \quad & \left\{ \begin{array}{l} 3\mu_{\text{Sn}} + 4\mu_{\text{N}} \leq \Delta H_{\text{Sn}_3\text{N}_4} (\text{Fd}\bar{3}\text{m}) (1.47 \text{ eV}) \\ \mu_{\text{Sn}} + \mu_{\text{N}} \leq \Delta H_{\text{SnN}} (\text{Cm}) (0.94 \text{ eV}) \\ 3\mu_{\text{Sn}} + \mu_{\text{N}} \leq \Delta H_{\text{Sn}_3\text{N}} (\text{P6}_3/\text{mmc}) (-4.02 \text{ eV}) \\ \mu_{\text{Sn}} + 4\mu_{\text{N}} + 12\mu_{\text{O}} \leq \Delta H_{\text{Sn}(\text{NO}_3)_4} (\text{P2}_1/\text{c}) (-8.01 \text{ eV}) \\ 2\mu_{\text{Sn}} + 2\mu_{\text{N}} + \mu_{\text{O}} \leq \Delta H_{\text{Sn}_2\text{N}_2\text{O}} (\text{I4}_1/\text{amd}) (-1.64 \text{ eV}) \\ 2\mu_{\text{N}} + 5\mu_{\text{O}} \leq \Delta H_{\text{N}_2\text{O}_5} (\text{P6}_3/\text{mmc}) (-1.01 \text{ eV}) \end{array} \right. \\
& \left\{ \begin{array}{l} 2\mu_{\text{N}} + \mu_{\text{O}} \leq \Delta H_{\text{N}_2\text{O}} (\text{P2}_1/\text{3}) (-0.15 \text{ eV}) \\ \mu_{\text{N}} + 2\mu_{\text{O}} \leq \Delta H_{\text{NO}_2} (\text{P2}_1/\text{c}) (-0.13 \text{ eV}) \\ \mu_{\text{N}} + 3\mu_{\text{O}} \leq \Delta H_{\text{NO}_3} (\text{P2}_1/\text{c}) (-0.05 \text{ eV}) \\ 2\mu_{\text{N}} + 3\mu_{\text{O}} \leq \Delta H_{\text{N}_2\text{O}_3} (\text{P2}_12_12_1) (-0.14 \text{ eV}) \\ \mu_{\text{N}} + \mu_{\text{O}} \leq \Delta H_{\text{NO}} (\text{P2}_12_12_1) (1.29 \text{ eV}) \end{array} \right.
\end{aligned}$$

$$\begin{aligned}
64 \quad & (\text{S7}) \\
65 \quad & \left\{ \begin{array}{l} \mu_{\text{Sn}} + \mu_{\text{Cl}} \leq \Delta H_{\text{SnCl}} (\text{P6}_3/\text{mc}) (-1.08 \text{ eV}) \\ \mu_{\text{Sn}} + 2\mu_{\text{Cl}} \leq \Delta H_{\text{SnCl}_2} (\text{Pnma}) (-3.56 \text{ eV}) \\ \mu_{\text{Sn}} + 4\mu_{\text{Cl}} \leq \Delta H_{\text{SnCl}_4} (\text{P2}_1/\text{c}) (-4.33 \text{ eV}) \\ 2\mu_{\text{Sn}} + 4\mu_{\text{Cl}} + 3\mu_{\text{O}} \leq \Delta H_{\text{Sn}_2\text{Cl}_4\text{O}_3} (\text{P2}_1/\text{c}) (-7.34 \text{ eV}) \\ \mu_{\text{Sn}} + 3\mu_{\text{Cl}} + 4\mu_{\text{O}} \leq \Delta H_{\text{SnCl}_3\text{O}_4} (\text{P2}_1/\text{c}) (-3.21 \text{ eV}) \\ \mu_{\text{Sn}} + 4\mu_{\text{Cl}} + 5\mu_{\text{O}} \leq \Delta H_{\text{SnCl}_4\text{O}_5} (\text{C2/c}) (-1.32 \text{ eV}) \\ \mu_{\text{Sn}} + 2\mu_{\text{Cl}} + 2\mu_{\text{O}} \leq \Delta H_{\text{Sn}(\text{ClO})_2} (\text{P2}_1/\text{c}) (-2.25 \text{ eV}) \end{array} \right. \\
& \left\{ \begin{array}{l} 2\mu_{\text{Cl}} + 7\mu_{\text{O}} \leq \Delta H_{\text{Cl}_2\text{O}_7} (\text{C2/c}) (1.46 \text{ eV}) \\ 2\mu_{\text{Cl}} + \mu_{\text{O}} \leq \Delta H_{\text{Cl}_2\text{O}} (\text{I4}_1/\text{amd}) (0.34 \text{ eV}) \\ \mu_{\text{Cl}} + 2\mu_{\text{O}} \leq \Delta H_{\text{ClO}_2} (\text{pbca}) (0.76 \text{ eV}) \\ \mu_{\text{Cl}} + 3\mu_{\text{O}} \leq \Delta H_{\text{ClO}_3} (\text{Cc}) (0.32 \text{ eV}) \\ \mu_{\text{Cl}} + 5\mu_{\text{O}} \leq \Delta H_{\text{ClO}_5} (\text{P2}_1/\text{c}) (1.75 \text{ eV}) \\ \mu_{\text{Cl}} + 6\mu_{\text{O}} \leq \Delta H_{\text{ClO}_6} (\text{Pnma}) (2.08 \text{ eV}) \\ \mu_{\text{Cl}} + \mu_{\text{O}} \leq \Delta H_{\text{ClO}} (\text{Pm}\bar{3}\text{m}) (0.53 \text{ eV}) \end{array} \right. \quad (\text{S8})
\end{aligned}$$

66 **III. Electronic structures of the energetically favorable interfaces**

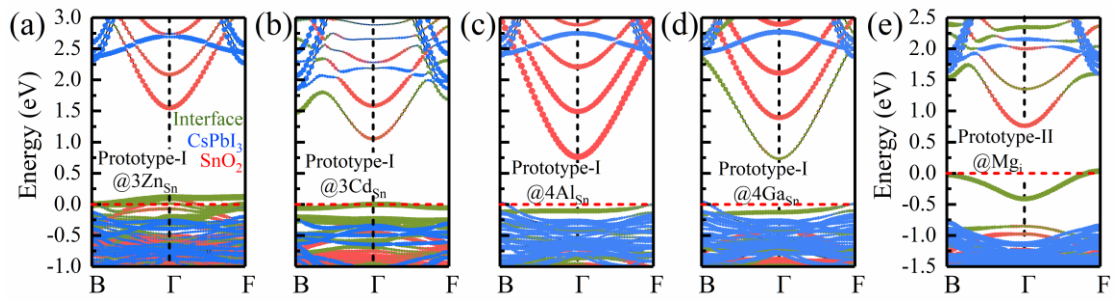

67  
68 **Fig. S4.** Band structures of the prototype-I heterojunction with defects of (a)  $3\text{Zn}_{\text{Sn}}$ , (b)  $3\text{Cd}_{\text{Sn}}$ , (c)  $4\text{Al}_{\text{Sn}}$  and (d)  
69  $4\text{Ga}_{\text{Sn}}$  at the interface, and (e) the prototype-II heterojunction with defects of Mg<sub>i</sub>. The red, blue and green circles in  
70 the band structures represent the contribution of the electronic states that come from the bulk  $\text{SnO}_2$ ,  $\text{CsPbI}_3$  and the  
71 interface, respectively. The red dashed lines indicate the energy positions of the highest occupied states.

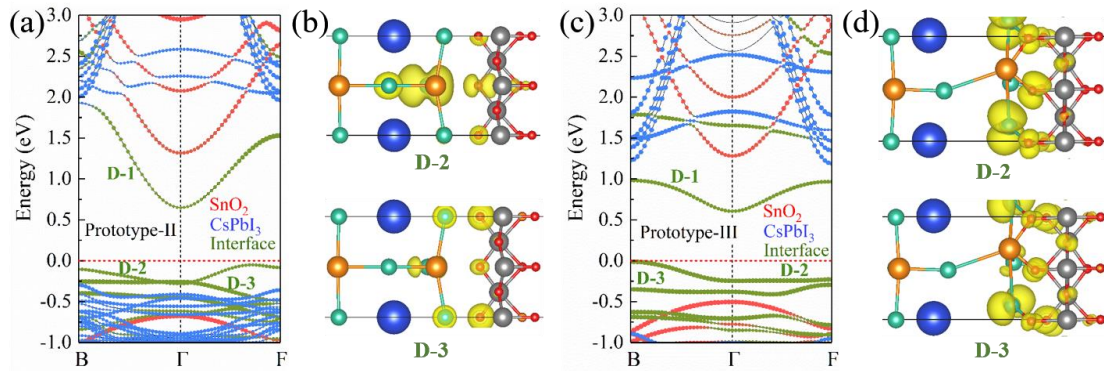

72  
73 **Fig. S5.** Band structure and interfacial structure with partial charge densities of prototype-II and prototype-III  
74 heterojunctions. (a) Band structures of the prototype-II heterojunction. The interfacial charge distribution in real  
75 space corresponding to the interfacial states D-2 and D-3 are displayed in (b). (c) Band structures of the prototype-  
76 III heterojunction. The interfacial charge distribution in real space corresponding to the interfacial states D-2 and D-  
77 3 are shown in (d).

78 **IV. Nonadiabatic molecular dynamics (NAMD) simulations**

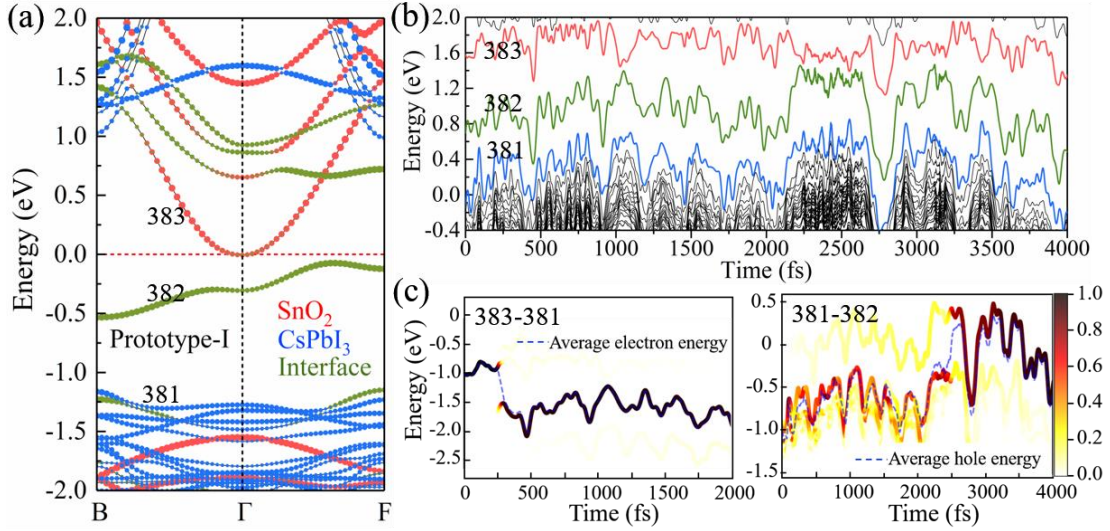

79

80 **Fig. S6.** Band structure, time-dependent evolutions of the energy states and time-dependent energy for carrier  
 81 trapping of the Prototype-I heterojunction. (a) Band structure of prototype-I heterojunction. The red, blue and green  
 82 circles in the band structures represent the contribution of the electronic states from the bulk SnO<sub>2</sub>, CsPbI<sub>3</sub> and the  
 83 interface, respectively. The representations are remained in the following figures of band structure. (b) Time-  
 84 dependent evolutions of the energy states of prototype-I heterojunction with a time step of 0.5 fs. (c) Time-  
 85 dependent energy change for electron and hole trapping of the prototype-I heterojunction. The color strip indicates  
 86 the electron or hole distribution on different energy states, and the blue dashed line represents the averaged electron  
 87 (left) or hole (right) energy. The electron and hole trapping paths are from the band index 383 to 381 (trapped at  
 88 band index 382) and from the band index 381 to 382, respectively.

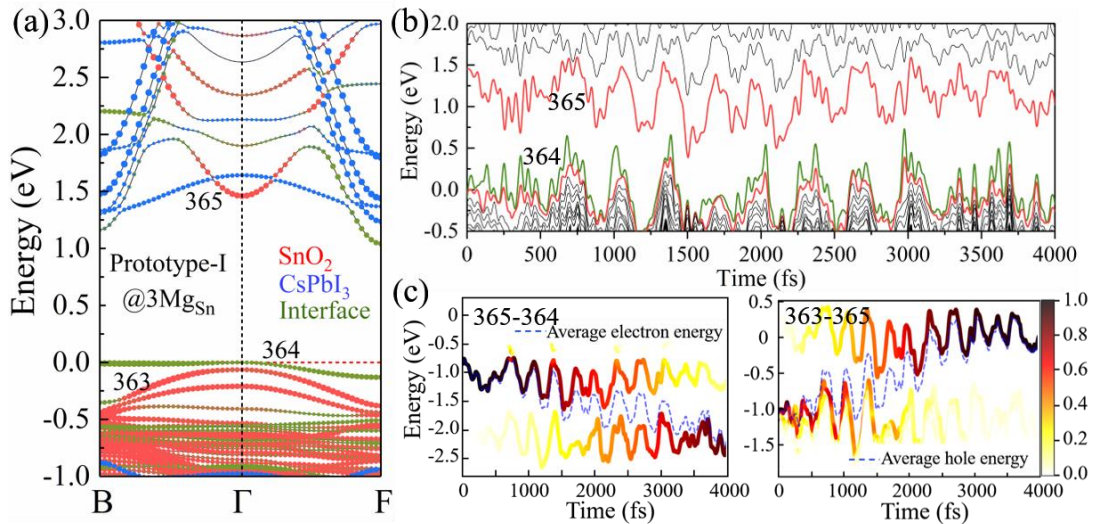

89

90 **Fig. S7.** Band structure, time-dependent evolutions of the energy states and time-dependent energy for carrier  
 91 trapping of the prototype-I heterojunction with 3Mg<sub>Sn</sub> defect at the interface. (a) Band structure of 3Mg<sub>Sn</sub>-doped  
 92 prototype-I heterojunction. (b) Time-dependent evolutions of the energy states of 3Mg<sub>Sn</sub>-doped prototype-I  
 93 heterojunction with a time step of 0.5 fs. (c) Time-dependent energy change for electron and hole trapping of the

94  $3\text{Mg}_{\text{Sn}}$ -doped prototype-I heterojunction. The color strip indicates the electron or hole distribution on different  
 95 energy states, and the blue dashed line represents the averaged electron (left) or hole (right) energy. The electron  
 96 and hole trapping paths are from band index 365 to 364 and from band index 363 to 365, respectively.

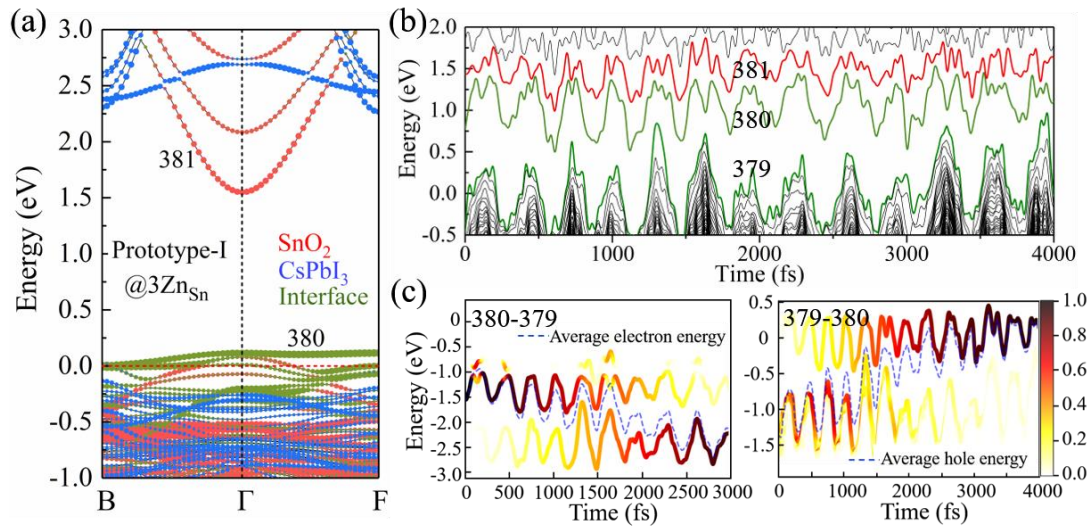

97  
 98 **Fig. S8.** Band structure, time-dependent evolutions of the energy states and time-dependent energy for carrier  
 99 trapping of the prototype-I heterojunction with  $3\text{Zn}_{\text{Sn}}$  defect at the interface. (a) Band structure of  $3\text{Zn}_{\text{Sn}}$ -doped  
 100 prototype-I heterojunction. (b) Time-dependent evolutions of the energy states of  $3\text{Zn}_{\text{Sn}}$ -doped prototype-I  
 101 heterojunction with a time step of 0.5 fs. (c) Time-dependent energy change for electron and hole trapping of the  
 102  $3\text{Zn}_{\text{Sn}}$ -doped prototype-I heterojunction. The color strip indicates the electron or hole distribution on different  
 103 energy states, and the blue dashed line represents the averaged electron (left) or hole (right) energy. The electron  
 104 and hole trapping paths are from band index 380 to 379 and from band index 379 to 380, respectively.

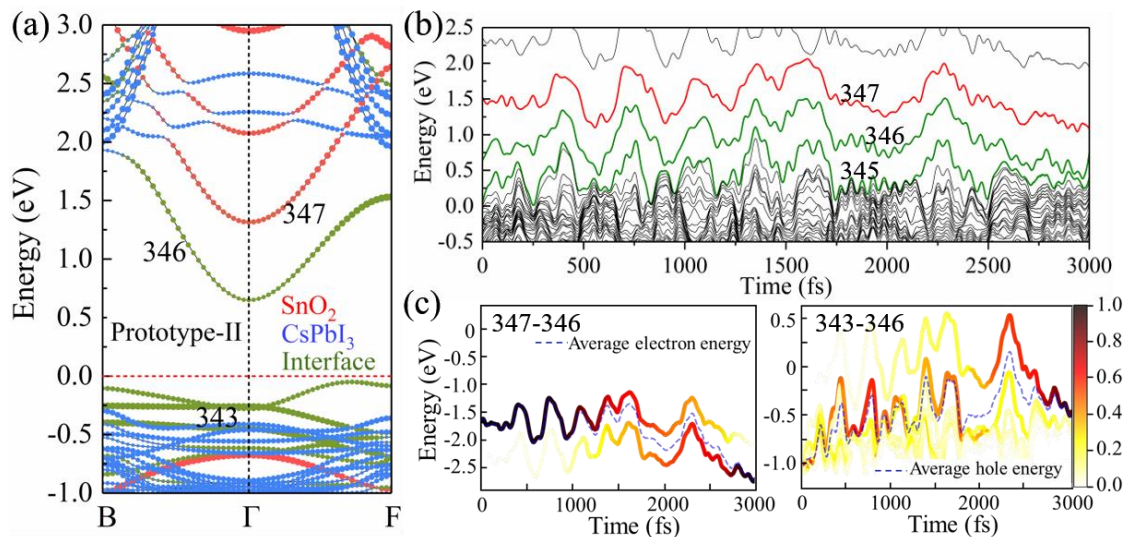

105  
 106 **Fig. S9.** Band structure, time-dependent evolutions of the energy states and time-dependent energy for carrier  
 107 trapping of the prototype-II heterojunction. (a) Band structure of prototype-II heterojunction. (b) Time-dependent  
 108 evolutions of the energy states of prototype-II heterojunction with a time step of 0.5 fs. (c) Time-dependent energy  
 109 change for electron and hole trapping of the prototype-II heterojunction. The color strip indicates the electron or hole

110 distribution on different energy states, and the blue dashed line represents the averaged electron (left) or hole (right)  
 111 energy. The electron and hole trapping paths are from band index 347 to 346 and from band index 343 to 346,  
 112 respectively.

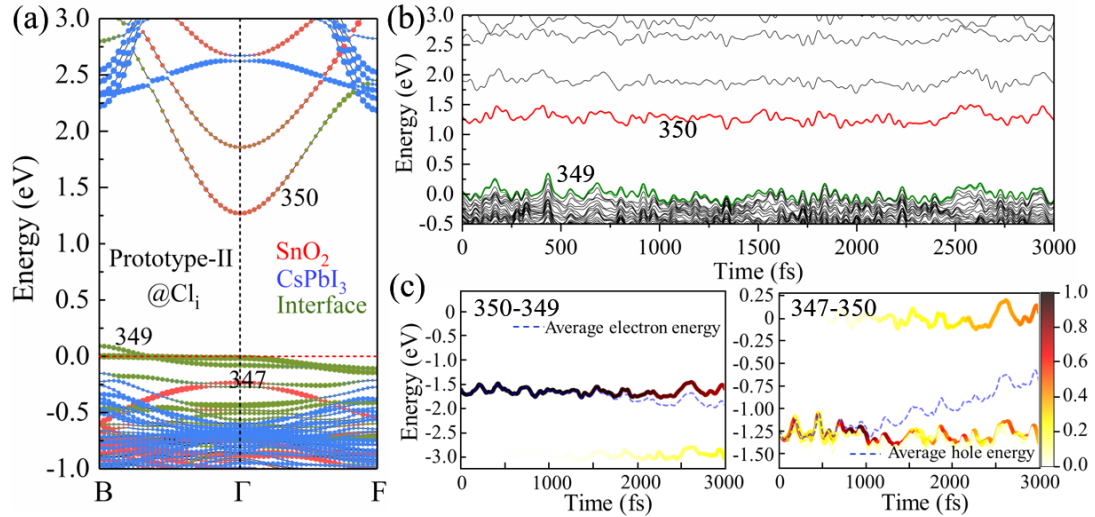

113

114 **Fig. S10.** Band structure, time-dependent evolutions of the energy states and time-dependent energy for carrier  
 115 trapping of the prototype-II heterojunction with  $\text{Cl}_i$  defect at the interface. (a) Band structure of  $\text{Cl}_i$ -doped prototype-  
 116 II heterojunction. (b) Time-dependent evolutions of the energy states of  $\text{Cl}_i$ -doped prototype-II heterojunction with  
 117 a time step of 0.5 fs. (c) Time-dependent energy change for electron and hole trapping of the  $\text{Cl}_i$ -doped prototype-II  
 118 heterojunction. The color strip indicates the electron or hole distribution on different energy states, and the blue  
 119 dashed line represents the averaged electron (left) or hole (right) energy. The electron and hole trapping paths are  
 120 from band index 350 to 349 and from band index 347 to 350, respectively.

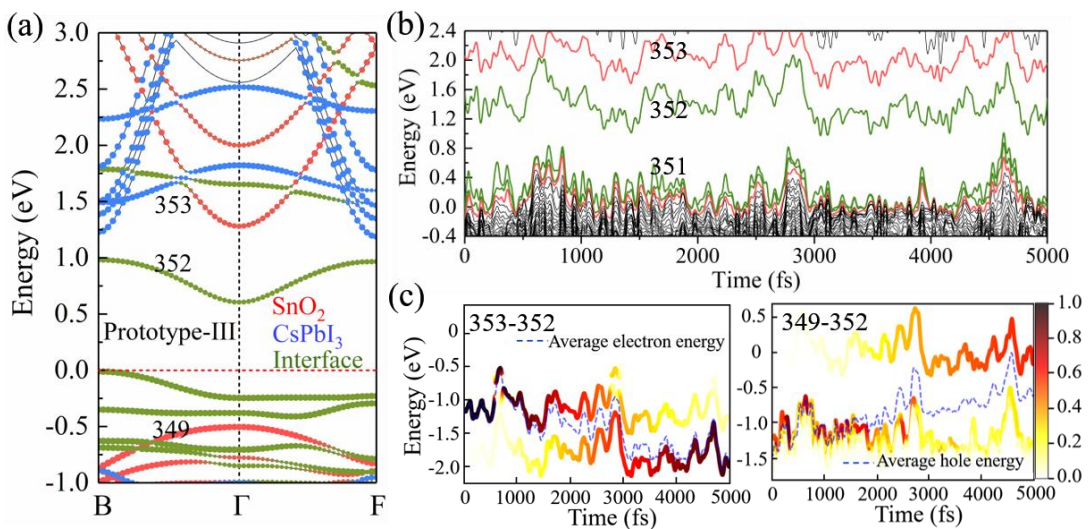

121

122 **Fig. S11.** Band structure, time-dependent evolutions of the energy states and time-dependent energy for carrier  
 123 trapping of the prototype-III heterojunction. (a) Band structure of prototype-III heterojunction. (b) Time-dependent  
 124 evolutions of the energy states of prototype-III heterojunction with a time step of 0.5 fs. (c) Time-dependent energy  
 125 change for electron and hole trapping of the prototype-III heterojunction. The color strip indicates the electron or



126 hole distribution on different energy states, and the blue dashed line represents the averaged electron (left) or hole  
 127 (right) energy. The electron and hole trapping paths are from band index 353 to 352 and from band index 349 to  
 128 352, respectively.

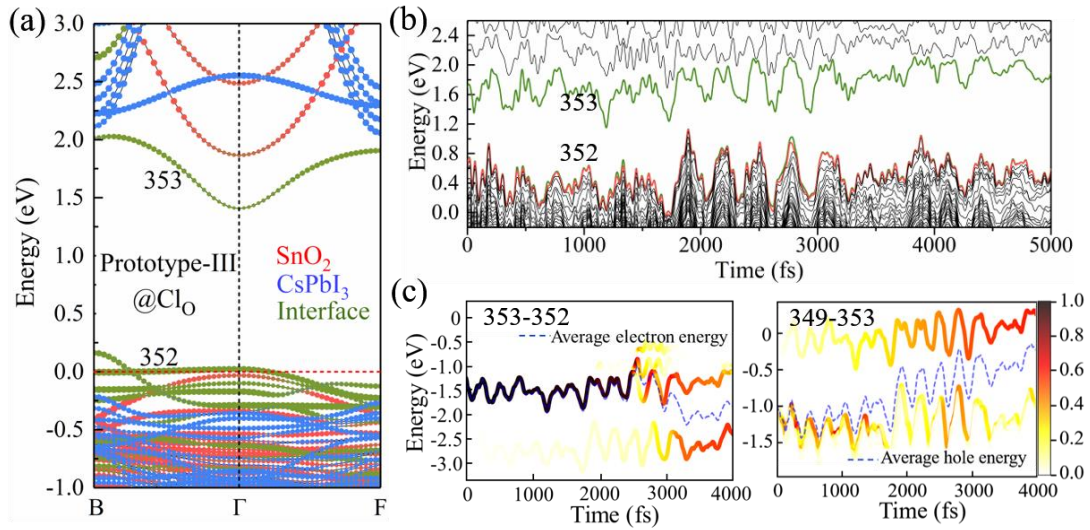

129  
 130 **Fig. S12.** Band structure, time-dependent evolutions of the energy states and time-dependent energy for carrier  
 131 trapping of the prototype-III heterojunction with Cl<sub>O</sub> defect at the interface. (a) Band structure of Cl<sub>O</sub>-doped  
 132 prototype-III heterojunction. (b) Time-dependent evolutions of the energy states of Cl<sub>O</sub>-doped prototype-III  
 133 heterojunction with a time step of 0.5 fs. (c) Time-dependent energy change for electron and hole trapping of the  
 134 Cl<sub>O</sub>-doped prototype-III heterojunction. The color strip indicates the electron or hole distribution on different energy  
 135 states, and the blue dashed line represents the averaged electron (left) or hole (right) energy. The electron and hole  
 136 trapping paths are from band index 353 to 352 and from band index 349 to 353, respectively.

137 **Reference:**

138 S1 Y. Huang, W.-J. Yin, and Y. He, *J. Phys. Chem. C*, 2018, 122(2), 1345–1350.

139 **Appendix:**

140 1. POSCAR of the prototype-I heterojunction

141 System  
 142 1.0000000000000000  
 143 6.4278000000000004 0.0000000000000000 0.0000000000000000  
 144 0.0000000000000000 6.5816000000000008 0.0000000000000000  
 145 0.0000000000000000 0.0000000000000000 71.5254999999999939  
 146 Sn O Cs Pb I H  
 147 24 48 4 4 12 6  
 148 Direct  
 149 0.9999919999999999 0.5000000000000000 0.3658322055490686  
 150 0.9999919999999999 0.0000000000000000 0.4132032055490740  
 151 0.9999919999999999 0.5000000000000000 0.4605752055490697  
 152 0.999980271187141 0.0013979567503384 0.5088902585905188  
 153 0.0000038882491324 0.4991704104496293 0.5554638207358735

|     |                    |                    |                    |
|-----|--------------------|--------------------|--------------------|
| 154 | 0.9999845672805776 | 0.0030765047559100 | 0.6090991386037246 |
| 155 | 0.7499919999999989 | 0.0000000000000000 | 0.3658322055490686 |
| 156 | 0.7499919999999989 | 0.5000000000000000 | 0.4132032055490740 |
| 157 | 0.7499919999999989 | 0.0000000000000000 | 0.4605752055490697 |
| 158 | 0.7501860797163218 | 0.5003890284283088 | 0.5077432971924054 |
| 159 | 0.7509098087503929 | 0.9981980800859063 | 0.5572865927069941 |
| 160 | 0.7524938036872300 | 0.5047714573209348 | 0.6022919793327901 |
| 161 | 0.4999919999999989 | 0.5000000000000000 | 0.3658322055490686 |
| 162 | 0.4999919999999989 | 0.0000000000000000 | 0.4132032055490740 |
| 163 | 0.4999919999999989 | 0.5000000000000000 | 0.4605752055490697 |
| 164 | 0.4999974077579381 | 0.0011334690122879 | 0.5088526002566667 |
| 165 | 0.5000040667617398 | 0.5001768191365201 | 0.5548621393110906 |
| 166 | 0.5000214049225065 | 0.9935002142624114 | 0.6044360549686658 |
| 167 | 0.2499919999999989 | 0.0000000000000000 | 0.3658322055490686 |
| 168 | 0.2499919999999989 | 0.5000000000000000 | 0.4132032055490740 |
| 169 | 0.2499919999999989 | 0.0000000000000000 | 0.4605752055490697 |
| 170 | 0.2498073652516979 | 0.5003913661843029 | 0.5077435943818003 |
| 171 | 0.2490972409506966 | 0.9981945619816059 | 0.5572876627383607 |
| 172 | 0.2475598864684230 | 0.5047878616561050 | 0.6022918531468093 |
| 173 | 0.9999919999999989 | 0.1938200000000023 | 0.3658322055490686 |
| 174 | 0.9999919999999989 | 0.6938200000000023 | 0.4132032055490669 |
| 175 | 0.9999919999999989 | 0.1938200000000023 | 0.4605752055490697 |
| 176 | 0.9999956447081502 | 0.6943942599486448 | 0.5091771205980322 |
| 177 | 0.0000058686565083 | 0.1944806343048242 | 0.5585248801419596 |
| 178 | 0.0000197880216817 | 0.6586511602206997 | 0.6145178165379832 |
| 179 | 0.9999919999999989 | 0.8061800000000048 | 0.3658322055490686 |
| 180 | 0.9999919999999989 | 0.3061799999999977 | 0.4132032055490669 |
| 181 | 0.9999919999999989 | 0.8061800000000048 | 0.4605752055490697 |
| 182 | 0.9999974342640314 | 0.3075954915188532 | 0.5079549097542326 |
| 183 | 0.0000038584746633 | 0.8052370456751206 | 0.5555495942408442 |
| 184 | 0.0000335599725503 | 0.3104347963407861 | 0.5993225735383021 |
| 185 | 0.7499919999999989 | 0.5000000000000000 | 0.3474692055490678 |
| 186 | 0.7499919999999989 | 0.0000000000000000 | 0.3948412055490707 |
| 187 | 0.7499919999999989 | 0.5000000000000000 | 0.4422122055490689 |
| 188 | 0.7498108008237097 | 0.9969907957804480 | 0.4901955915975833 |
| 189 | 0.7512183518468305 | 0.4884913854842878 | 0.5372050413003677 |
| 190 | 0.7572340621318219 | 0.9615732296179971 | 0.5872298885354041 |
| 191 | 0.7499919999999989 | 0.0000000000000000 | 0.3368232055490665 |
| 192 | 0.7499919999999989 | 0.5000000000000000 | 0.3841942055490719 |
| 193 | 0.7499919999999989 | 0.0000000000000000 | 0.4315662055490677 |
| 194 | 0.7499919999999989 | 0.5000000000000000 | 0.4789372055490730 |
| 195 | 0.7496936590770318 | 0.0092541149831646 | 0.5279252535854440 |
| 196 | 0.7461310318512204 | 0.5206773703828489 | 0.5741319956220963 |
| 197 | 0.4999919999999989 | 0.1938200000000023 | 0.3658322055490686 |

|     |                    |                    |                    |
|-----|--------------------|--------------------|--------------------|
| 198 | 0.4999919999999989 | 0.6938200000000023 | 0.4132032055490669 |
| 199 | 0.4999919999999989 | 0.1938200000000023 | 0.4605752055490697 |
| 200 | 0.4999977317086532 | 0.6939166067180409 | 0.5094451661110497 |
| 201 | 0.5000005324647461 | 0.1950266979997579 | 0.5598570660142812 |
| 202 | 0.5000292517566223 | 0.6842396218947684 | 0.6110712385155566 |
| 203 | 0.4999919999999989 | 0.8061800000000048 | 0.3658322055490686 |
| 204 | 0.4999919999999989 | 0.3061799999999977 | 0.4132032055490669 |
| 205 | 0.4999919999999989 | 0.8061800000000048 | 0.4605752055490697 |
| 206 | 0.4999962161713682 | 0.3078085217042243 | 0.5082378878767173 |
| 207 | 0.5000035489693744 | 0.8073931929046623 | 0.5556855571608992 |
| 208 | 0.5000181101873693 | 0.3094035105363560 | 0.6069153269041294 |
| 209 | 0.2499919999999989 | 0.5000000000000000 | 0.3474692055490678 |
| 210 | 0.2499919999999989 | 0.0000000000000000 | 0.3948412055490707 |
| 211 | 0.2499919999999989 | 0.5000000000000000 | 0.4422122055490689 |
| 212 | 0.2501816297971047 | 0.9969886855907575 | 0.4901958872918541 |
| 213 | 0.2487847539683798 | 0.4884932395404675 | 0.5372048996087742 |
| 214 | 0.2427759639281746 | 0.9615606516204025 | 0.5872328348824780 |
| 215 | 0.2499919999999989 | 0.0000000000000000 | 0.3368232055490665 |
| 216 | 0.2499919999999989 | 0.5000000000000000 | 0.3841942055490719 |
| 217 | 0.2499919999999989 | 0.0000000000000000 | 0.4315662055490677 |
| 218 | 0.2499919999999989 | 0.5000000000000000 | 0.4789372055490730 |
| 219 | 0.2503043358733805 | 0.0092533040148339 | 0.5279255522642075 |
| 220 | 0.2538849079540100 | 0.5206877561036549 | 0.5741316769618621 |
| 221 | 0.0001185901474372 | 0.5151603543752898 | 0.6646454579208623 |
| 222 | 0.9999378304400750 | 0.4995661667786138 | 0.7456720677369688 |
| 223 | 0.0000000000000000 | 0.4999970000000005 | 0.8274090000000029 |
| 224 | 0.0000000000000000 | 0.4999970000000005 | 0.9166999999999987 |
| 225 | 0.4999190609860804 | 0.0055337705667071 | 0.6958872134457579 |
| 226 | 0.4999778477366021 | 0.0001229477859610 | 0.7837747929188836 |
| 227 | 0.5000000000000000 | 0.9999970000000005 | 0.8720550000000031 |
| 228 | 0.5000000000000000 | 0.9999970000000005 | 0.9613470000000035 |
| 229 | 0.9999247186035731 | 0.0046019710103451 | 0.6979668191930699 |
| 230 | 0.999980075912546  | 0.9999450224720690 | 0.7841702612090771 |
| 231 | 0.0000000000000000 | 0.9999970000000005 | 0.8720550000000031 |
| 232 | 0.0000000000000000 | 0.9999970000000005 | 0.9613470000000035 |
| 233 | 0.5000163062447953 | 0.5039643607200048 | 0.6987131867308278 |
| 234 | 0.4999773689709812 | 0.5001027642756881 | 0.7843106955225565 |
| 235 | 0.5000000000000000 | 0.4999970000000005 | 0.8720550000000031 |
| 236 | 0.5000000000000000 | 0.4999970000000005 | 0.9613470000000035 |
| 237 | 0.4996272617681328 | 0.0180199509342458 | 0.6530886933850653 |
| 238 | 0.4999688145967056 | 0.0010663402596833 | 0.7407567871083458 |
| 239 | 0.5000000000000000 | 0.9999970000000005 | 0.8274090000000029 |
| 240 | 0.5000000000000000 | 0.9999970000000005 | 0.9166999999999987 |
| 241 | 0.7145289999999989 | 0.8547900000000013 | 0.3326282055490708 |

|     |                    |                    |                    |
|-----|--------------------|--------------------|--------------------|
| 242 | 0.3989049999999992 | 0.0328710000000001 | 0.3323232055490735 |
| 243 | 0.2186459999999997 | 0.8537740000000014 | 0.3326462055490680 |
| 244 | 0.2471290000000010 | 0.3833580000000012 | 0.3378912055490702 |
| 245 | 0.8997850000000014 | 0.0292540000000017 | 0.3323302055490700 |
| 246 | 0.7470209999999966 | 0.3828060000000022 | 0.3379422055490693 |

247 2. POSCAR of the prototype-II heterojunction

248 System

249 1.0000000000000000

250 6.4278000000000004 0.0000000000000000 0.0000000000000000

251 0.0000000000000000 6.5816000000000008 0.0000000000000000

252 0.0000000000000000 0.0000000000000000 66.0000000000000000

253 Sn O Cs Pb I H

254 20 42 4 5 14 6

255 Selective dynamics

256 Direct

257 0.2500000000000000 0.5000000000000000 0.1575786969696935

258 0.2500000000000000 0.0000000000000000 0.2089156969696973

259 0.2500000000000000 0.5000000000000000 0.2602536969696985

260 0.2488012914285349 0.9999981545456791 0.3111025824177105

261 0.2498114601995525 0.4999949000427790 0.3668296601323391

262 0.0000000000000000 0.0000000000000000 0.1575786969696935

263 0.0000000000000000 0.5000000000000000 0.2089156969696973

264 0.0000000000000000 0.0000000000000000 0.2602536969696985

265 0.0000010457235504 0.4999978932520506 0.3127698398941448

266 0.0000010228279805 0.9999974060824286 0.3631599784468023

267 0.7500000000000000 0.5000000000000000 0.1575786969696935

268 0.7500000000000000 0.0000000000000000 0.2089156969696973

269 0.7500000000000000 0.5000000000000000 0.2602536969696985

270 0.7512025463223821 0.9999965942390503 0.3111026604081175

271 0.7501904299772590 0.4999945671723225 0.3668303978292045

272 0.5000000000000000 0.0000000000000000 0.1575786969696935

273 0.5000000000000000 0.5000000000000000 0.2089156969696973

274 0.5000000000000000 0.0000000000000000 0.2602536969696985

275 0.5000015639031119 0.4999964591729054 0.3126721337741927

276 0.4999996805913227 0.9999940548666615 0.3614400574329366

277 0.2500000000000000 0.1938200000000023 0.1575786969696935

278 0.2500000000000000 0.6938200000000023 0.2089156969696973

279 0.2500000000000000 0.1938200000000023 0.2602536969696985

280 0.2498138188794030 0.6950934514968665 0.3119658044028313

281 0.2524280138077089 0.1861127666091065 0.3669600310534236

282 0.2500000000000000 0.8061799999999977 0.1575786969696935

283 0.2500000000000000 0.3061799999999977 0.2089156969696973

284 0.2500000000000000 0.8061799999999977 0.2602536969696985

285 0.2498121211832114 0.3049036406056587 0.3119651440843825

|     |                    |                    |                    |
|-----|--------------------|--------------------|--------------------|
| 286 | 0.2524266263582291 | 0.8138771097060129 | 0.3669582433245679 |
| 287 | 0.0000000000000000 | 0.5000000000000000 | 0.1376786969696937 |
| 288 | 0.0000000000000000 | 0.0000000000000000 | 0.1890156969696974 |
| 289 | 0.0000000000000000 | 0.5000000000000000 | 0.2403536969696987 |
| 290 | 0.0000033366723002 | 0.9999983995869286 | 0.2916725552676525 |
| 291 | 0.9999983919523387 | 0.4999903140637088 | 0.3443788620816264 |
| 292 | 0.0000000000000000 | 0.0000000000000000 | 0.1261406969696992 |
| 293 | 0.0000000000000000 | 0.5000000000000000 | 0.1774786969697004 |
| 294 | 0.0000000000000000 | 0.0000000000000000 | 0.2288156969696971 |
| 295 | 0.0000000000000000 | 0.5000000000000000 | 0.2801536969696983 |
| 296 | 0.000004702753174  | 0.0000010749354971 | 0.3322192919898654 |
| 297 | 0.0000024779424166 | 0.4999976716803474 | 0.3850642866602882 |
| 298 | 0.7500000000000000 | 0.1938200000000023 | 0.1575786969696935 |
| 299 | 0.7500000000000000 | 0.6938200000000023 | 0.2089156969696973 |
| 300 | 0.7500000000000000 | 0.1938200000000023 | 0.2602536969696985 |
| 301 | 0.7501895022306897 | 0.6950943052876610 | 0.3119655807604360 |
| 302 | 0.7475722175676367 | 0.1861129237780830 | 0.3669596767773555 |
| 303 | 0.7500000000000000 | 0.8061799999999977 | 0.1575786969696935 |
| 304 | 0.7500000000000000 | 0.3061799999999977 | 0.2089156969696973 |
| 305 | 0.7500000000000000 | 0.8061799999999977 | 0.2602536969696985 |
| 306 | 0.7501888836023696 | 0.3049013558887452 | 0.3119649427430957 |
| 307 | 0.7475750105729020 | 0.8138756194580452 | 0.3669583389013908 |
| 308 | 0.5000000000000000 | 0.5000000000000000 | 0.1376786969696937 |
| 309 | 0.5000000000000000 | 0.0000000000000000 | 0.1890156969696974 |
| 310 | 0.5000000000000000 | 0.5000000000000000 | 0.2403536969696987 |
| 311 | 0.5000004380020968 | 0.9999981878708368 | 0.2916762329082587 |
| 312 | 0.5000031242622427 | 0.4999898338493480 | 0.3443024431194672 |
| 313 | 0.5000000000000000 | 0.0000000000000000 | 0.1261406969696992 |
| 314 | 0.5000000000000000 | 0.5000000000000000 | 0.1774786969697004 |
| 315 | 0.5000000000000000 | 0.0000000000000000 | 0.2288156969696971 |
| 316 | 0.5000000000000000 | 0.5000000000000000 | 0.2801536969696983 |
| 317 | 0.5000012013600355 | 0.999999986327168  | 0.3313422089567268 |
| 318 | 0.4999992045790762 | 0.5000003464454466 | 0.3851619919671947 |
| 319 | 0.0000250963547970 | 0.4999936477690170 | 0.4683204433035613 |
| 320 | 0.0000004323464040 | 0.5000028999194015 | 0.5667833635182475 |
| 321 | 0.0000000000000000 | 0.4999970000000005 | 0.6656369999999967 |
| 322 | 0.0000000000000000 | 0.4999970000000005 | 0.7624050000000011 |
| 323 | 0.5000163581316812 | 0.0000144177316841 | 0.4273653299013915 |
| 324 | 0.4999971217290877 | 0.9999649589003567 | 0.5225504840442738 |
| 325 | 0.4999960349328916 | 0.9999463868439449 | 0.6178962161364936 |
| 326 | 0.5000000000000000 | 0.9999970000000005 | 0.7140210000000025 |
| 327 | 0.5000000000000000 | 0.9999970000000005 | 0.8107880000000023 |
| 328 | 0.9999970827007587 | 0.0000313764720730 | 0.4187342643481600 |
| 329 | 0.0000002820529019 | 0.9999913632752211 | 0.5215388593159318 |

|     |                    |                    |                    |
|-----|--------------------|--------------------|--------------------|
| 330 | 0.9999992153274349 | 0.9998499468851918 | 0.6174694162594960 |
| 331 | 0.0000000000000000 | 0.9999970000000005 | 0.7140210000000025 |
| 332 | 0.0000000000000000 | 0.9999970000000005 | 0.8107880000000023 |
| 333 | 0.5000009837753439 | 0.4999865760275455 | 0.4355208878590844 |
| 334 | 0.5000055981173972 | 0.4999935062842695 | 0.5230460129512622 |
| 335 | 0.5000006892508821 | 0.4999092907060287 | 0.6175328757073970 |
| 336 | 0.5000000000000000 | 0.4999970000000005 | 0.7140210000000025 |
| 337 | 0.5000000000000000 | 0.4999970000000005 | 0.8107880000000023 |
| 338 | 0.4999980781488631 | 0.9999854088675804 | 0.4732069177875218 |
| 339 | 0.5000006557914958 | 0.9999737545646994 | 0.5696037908008762 |
| 340 | 0.5000000000000000 | 0.9999970000000005 | 0.6656369999999967 |
| 341 | 0.5000000000000000 | 0.9999970000000005 | 0.7624050000000011 |
| 342 | 0.9645370000000000 | 0.8547900000000013 | 0.1215946969696944 |
| 343 | 0.6489130000000003 | 0.0328710000000001 | 0.1212646969696962 |
| 344 | 0.4686540000000008 | 0.8537740000000014 | 0.1216146969696936 |
| 345 | 0.4971370000000022 | 0.3833580000000012 | 0.1272986969696959 |
| 346 | 0.1497930000000025 | 0.0292540000000017 | 0.1212716969696999 |
| 347 | 0.9970289999999977 | 0.3828060000000022 | 0.1273536969696991 |

348 3. POSCAR of the prototype-III heterojunction

349 System

|     |                    |                    |                     |
|-----|--------------------|--------------------|---------------------|
| 350 | 1.0000000000000000 |                    |                     |
| 351 | 6.4278000000000022 | 0.0000000000000000 | 0.0000000000000000  |
| 352 | 0.0000000000000000 | 6.5815999999999999 | 0.0000000000000000  |
| 353 | 0.0000000000000000 | 0.0000000000000000 | 66.0000000000000000 |

|     |    |    |    |    |    |   |
|-----|----|----|----|----|----|---|
| 354 | Sn | O  | Cs | Pb | I  | H |
| 355 | 20 | 44 | 4  | 5  | 14 | 6 |

356 Selective dynamics

357 Direct

|     |                    |                    |                    |
|-----|--------------------|--------------------|--------------------|
| 358 | 0.2500000000000000 | 0.5000000000000000 | 0.1536087499999965 |
| 359 | 0.2500000000000000 | 0.0000000000000000 | 0.2049462350000013 |
| 360 | 0.2500000000000000 | 0.5000000000000000 | 0.2562837199999990 |
| 361 | 0.2514810102489804 | 0.0010476725229793 | 0.3080321229219862 |
| 362 | 0.2442230196552941 | 0.5055153413731261 | 0.3592188810646917 |
| 363 | 0.0000000000000000 | 0.0000000000000000 | 0.1536087499999965 |
| 364 | 0.0000000000000000 | 0.5000000000000000 | 0.2049462350000013 |
| 365 | 0.0000000000000000 | 0.0000000000000000 | 0.2562837199999990 |
| 366 | 0.0020442146920701 | 0.5020401000140993 | 0.3074588043911106 |
| 367 | 0.0039018928030004 | 0.0027680168452875 | 0.3601006693609605 |
| 368 | 0.7500000000000000 | 0.5000000000000000 | 0.1536087499999965 |
| 369 | 0.7500000000000000 | 0.0000000000000000 | 0.2049462350000013 |
| 370 | 0.7500000000000000 | 0.5000000000000000 | 0.2562837199999990 |
| 371 | 0.7505811096865287 | 0.0012373610606957 | 0.3080515485282049 |
| 372 | 0.7676417637444573 | 0.5038942690652704 | 0.3600576453774309 |
| 373 | 0.5000000000000000 | 0.0000000000000000 | 0.1536087499999965 |

|     |                    |                    |                    |
|-----|--------------------|--------------------|--------------------|
| 374 | 0.5000000000000000 | 0.5000000000000000 | 0.2049462350000013 |
| 375 | 0.5000000000000000 | 0.0000000000000000 | 0.2562837199999990 |
| 376 | 0.5025264815308148 | 0.5008316976206544 | 0.3080253353511964 |
| 377 | 0.5044920027690338 | 0.0079434599893915 | 0.3601818359637932 |
| 378 | 0.2500000000000000 | 0.1938200000000023 | 0.1536087499999965 |
| 379 | 0.2500000000000000 | 0.6938200000000023 | 0.2049462350000013 |
| 380 | 0.2500000000000000 | 0.1938200000000023 | 0.2562837199999990 |
| 381 | 0.2543312663587827 | 0.6943009204821635 | 0.3080127307354061 |
| 382 | 0.2500152103371533 | 0.1986047185936570 | 0.3599723389020255 |
| 383 | 0.2500000000000000 | 0.8061800000000048 | 0.1536087499999965 |
| 384 | 0.2500000000000000 | 0.3061799999999977 | 0.2049462350000013 |
| 385 | 0.2500000000000000 | 0.8061800000000048 | 0.2562837199999990 |
| 386 | 0.2532886568036616 | 0.3080028379030679 | 0.3082748558679782 |
| 387 | 0.2550663616715809 | 0.8118276286382127 | 0.3601424912221063 |
| 388 | 0.0000000000000000 | 0.5000000000000000 | 0.1337088874999992 |
| 389 | 0.0000000000000000 | 0.0000000000000000 | 0.1850463724999969 |
| 390 | 0.0000000000000000 | 0.5000000000000000 | 0.2363838575000017 |
| 391 | 0.0000000000000000 | 0.0000000000000000 | 0.2877213424999994 |
| 392 | 0.0030858949535073 | 0.5087651222541183 | 0.3384669273986418 |
| 393 | 0.0201202748742446 | 0.0066629088035057 | 0.3939278372945054 |
| 394 | 0.0000000000000000 | 0.0000000000000000 | 0.1221711275000033 |
| 395 | 0.0000000000000000 | 0.5000000000000000 | 0.1735086125000009 |
| 396 | 0.0000000000000000 | 0.0000000000000000 | 0.2248460974999986 |
| 397 | 0.0000000000000000 | 0.5000000000000000 | 0.2761835825000034 |
| 398 | 0.0021075700036306 | 0.9997586742578335 | 0.3282207649351463 |
| 399 | 0.0091835986026680 | 0.5035537212770578 | 0.3796293115478733 |
| 400 | 0.7500000000000000 | 0.1938200000000023 | 0.1536087499999965 |
| 401 | 0.7500000000000000 | 0.6938200000000023 | 0.2049462350000013 |
| 402 | 0.7500000000000000 | 0.1938200000000023 | 0.2562837199999990 |
| 403 | 0.7500882966300324 | 0.6946990511094882 | 0.3078521252403661 |
| 404 | 0.7582102205377481 | 0.1986951012217375 | 0.3589358027876841 |
| 405 | 0.7500000000000000 | 0.8061800000000048 | 0.1536087499999965 |
| 406 | 0.7500000000000000 | 0.3061799999999977 | 0.2049462350000013 |
| 407 | 0.7500000000000000 | 0.8061800000000048 | 0.2562837199999990 |
| 408 | 0.7511283311946357 | 0.3078249001362536 | 0.3080387426360076 |
| 409 | 0.7545399544518432 | 0.8105020097093956 | 0.3604707110907839 |
| 410 | 0.5000000000000000 | 0.5000000000000000 | 0.1337088874999992 |
| 411 | 0.5000000000000000 | 0.0000000000000000 | 0.1850463724999969 |
| 412 | 0.5000000000000000 | 0.5000000000000000 | 0.2363838575000017 |
| 413 | 0.5000000000000000 | 0.0000000000000000 | 0.2877213424999994 |
| 414 | 0.5069888216780143 | 0.5032391352646499 | 0.3409824067699958 |
| 415 | 0.5211983106275682 | 0.0278865313920846 | 0.3904587366996992 |
| 416 | 0.5000000000000000 | 0.0000000000000000 | 0.1221711275000033 |
| 417 | 0.5000000000000000 | 0.5000000000000000 | 0.1735086125000009 |

|     |                    |                    |                    |
|-----|--------------------|--------------------|--------------------|
| 418 | 0.5000000000000000 | 0.0000000000000000 | 0.2248460974999986 |
| 419 | 0.5000000000000000 | 0.5000000000000000 | 0.2761835825000034 |
| 420 | 0.5018657308633934 | 0.0022387078327881 | 0.3283581747038582 |
| 421 | 0.4995277772094582 | 0.5076047447989112 | 0.3815801821520424 |
| 422 | 0.9900360271452513 | 0.5023570812399996 | 0.4868726268901540 |
| 423 | 0.9998859830896549 | 0.5002932036386198 | 0.5758963775816923 |
| 424 | 0.0000000000000000 | 0.4999969612252357 | 0.6656373236363677 |
| 425 | 0.0000000000000000 | 0.4999969612252357 | 0.7624047386363628 |
| 426 | 0.3116687838150369 | 0.0388089527926567 | 0.4146137527628397 |
| 427 | 0.5043580357414541 | 0.9957933966529211 | 0.5197341962624407 |
| 428 | 0.5000000000000000 | 0.9999969612252357 | 0.6172536161363666 |
| 429 | 0.5000000000000000 | 0.9999969612252357 | 0.7140210311363617 |
| 430 | 0.5000000000000000 | 0.9999969612252357 | 0.8107884461363639 |
| 431 | 0.8594053735478440 | 0.8177924721925862 | 0.4120994991595381 |
| 432 | 0.0040902371744380 | 0.9974089541208428 | 0.5226450012826191 |
| 433 | 0.0000000000000000 | 0.9999969612252357 | 0.6172536161363666 |
| 434 | 0.0000000000000000 | 0.9999969612252357 | 0.7140210311363617 |
| 435 | 0.0000000000000000 | 0.9999969612252357 | 0.8107884461363639 |
| 436 | 0.4432372839814747 | 0.5189204667623457 | 0.4107344496350152 |
| 437 | 0.4985167393187950 | 0.4963907942944772 | 0.5227657547431903 |
| 438 | 0.5000000000000000 | 0.4999969612252357 | 0.6172536161363666 |
| 439 | 0.5000000000000000 | 0.4999969612252357 | 0.7140210311363617 |
| 440 | 0.5000000000000000 | 0.4999969612252357 | 0.8107884461363639 |
| 441 | 0.5188250373955228 | 0.9905008835006939 | 0.4730695035678565 |
| 442 | 0.5030753985207284 | 0.9989178046770562 | 0.5699398415326584 |
| 443 | 0.5000000000000000 | 0.9999969612252357 | 0.6656373236363677 |
| 444 | 0.5000000000000000 | 0.9999969612252357 | 0.7624047386363628 |
| 445 | 0.9645374970829863 | 0.8547901037103429 | 0.1176249574090917 |
| 446 | 0.6489129522542711 | 0.0328708501686492 | 0.1172948860000034 |
| 447 | 0.4686543544447588 | 0.8537741083414332 | 0.1176448164772737 |
| 448 | 0.4971371328837222 | 0.3833582525829584 | 0.1233293035454537 |
| 449 | 0.1497928347957327 | 0.0292538666555231 | 0.1173024187500005 |
| 450 | 0.9970292443370994 | 0.3828062550990623 | 0.1233840871818188 |
